# Supplementary material for: Evaluating quantile-based bias adjustment methods for climate change scenarios
Source: Copernicus journal article supplement (doi:10.5194/hess-2021-498), 2021-11-02
Supplement: Supplementary file [file hess-2021-498-RC2-supplement.pdf]

Review of

‘Evaluating quantile-based bias adjustment methods for climate change scenarios’

by F. Lehner, I. Nadeem and H. Formayer

**Recommendation: minor revisions**

This manuscript presents the ‘Empirical Quantile Adjustment’ (EQM) method for statistical bias correction of climate model output, including a version that allows to increase the number of dry days (EQAd). The EQA method is a development of existing versions for bias correction, while the dry-day correction is a new approach. The manuscript compares EQAd with two frequently used alternative approaches to bias correction, with respect to the representation of the mean, of the climate change signal (CCS), and of the number of dry days. These criteria reflect practical requirements well.

It is found that EQAd performs as well or better than the other methods on each of the criteria. This is not surprising because EQAd has been designed to do well with respect to all of these criteria. The value of the manuscript is that it demonstrates that other methods have some practically relevant shortcomings, and that it is possible to construct a bias correction method that addresses these.

I have reviewed a previous submission by the authors on this topic, which was not published, mainly because the bias correction approach taken was not justified well enough. The new manuscript is substantially improved, much more systematic, and now explains most conceptual and technical aspects very well. In addition, it provides a systematic overview on the various approaches to bias correction with a good discussion of their structural differences.

This paper is now a very useful contribution to the development and understanding of bias correction methods. It is concisely written and it was a pleasure reading it.

The points listed below should be further clarified. I recommend publication after they have been addressed.

**Specific comments**

1)

The authors frequently mention that EQA and similar methods are based on quantiles, that the biases at quantiles do not change over time etc., whereas QM is said to be based on specific values. This terminology is not wrong, but I don’t think it is the best choice to reduce confusion. Many researchers would presumably consider QM to also be based on quantiles (hence the name). The key question is from which distribution the quantiles are determined for a given value in the future. As mentioned by the authors in the last sentence of section 3.4 QM determines the quantile for a given future value from the calibration distribution.

This point should be clarified already in the introduction when the different approaches are discussed.

2)

The point above also applies to the discussion of stationarity in lines 63-68. QM assumes stationarity of the bias for each quantile with quantiles derived from the calibration distribution, regardless of whether a value is taken from the calibration or the future periods. EQA and similar methods assume a stationary bias for each quantile, but with the quantiles for a value from the future period derived from the future distribution. As discussed in the manuscript, the latter is for additive corrections equivalent to assuming a stationary bias in the mean, but this is not the case for multiplicative methods.

3)

Fig 3. is very helpful, but I am not convinced it is in the right place in the paper. The figure illustrates the two basic options for distribution-based bias correction. This is a general issue and not specific to EQA. The related discussion could be part of the method review in the introduction, or a new subsection could be included at the beginning of the method section that systematically discusses the two options (this section could also address the next two points).

The very large changes in the CCS introduced by QM in Fig. 3 are essentially caused by the fact that the raw CCS is large compared to the standard deviation of the distributions, and that the standard deviations of the model and the observations are quite different. This is useful to clarify the argument, but it might be interesting to also consider a less extreme example.

4)

In section 3.1 the authors attempt to explain why the EQA and other approaches that determine the quantile for a future value from the future distribution are better justified than the QM approach. The argument is based on the claim that RCMs are 'able to predict a ranked' category, and on 'a specific weather pattern will have different absolute values in the future but the same quantile'. The arguments are not clear to me. Ranking is an ordering of a set of values. Which values are considered here? What means a weather pattern has the same quantile?

These arguments should be clarified and may add interesting aspects, but views on these issues might differ. I don't think these are the key arguments in support of bias correction methods that use future distributions.

5)

In my understanding the most important justification for using EQA and similar methods is that it preserves the CCS for additive corrections, and with the modification introduced in the paper also for multiplicative corrections.

As I said in my previous review it is far from clear that the CCS should be preserved. Nevertheless, preserving the CCS might in many applications be a more sensible approach than altering it in a rather uncontrolled way by using QM. It is good that the paper makes it clear now that preserving the CCS is a choice, not an a priori given desired property. I think it would be good to emphasise that if researchers decided to retain the CCS the EQA method provides a bias correction method that does this and has additional useful properties.

6) Line 213: F\_100 are not 'the 100 CVs to correct the model data', they are the percentiles for which the CVs are defined through eqn. 3.

7) Lines 221-222: What is called ‘parameters’ here should be ‘variables’. A variable is a number that changes, for instance in time and space, and specifies the state of a system. A parameter is a number that can take different values and once specified specifies the system itself (for instance parameterisations in dynamical models or parameters in statistical models).

I know that meteorologist tend to use the former when it should be the latter, but throughout most of the paper variables are correctly called variables, and this should be done everywhere.

8) Eqns. 5 and 6: The variable names for the ranked variables should be different from those for the unranked variables. This could be done for instance by adding a ‘r’ to the subscripts.

9) Lines 246-248: The explanation for step 6 is unclear.

10) Line 300: ‘in future’ should be ‘in the future’

11) Fig. 5. It would be informative to add a panel that shows the difference between the raw model and the observations.

12) Line 378: I don’t think one should use the formulation ‘error in CCS’, because the true CCS is unknown. It is better to say that QM modifies the CCS from the raw model, and that the specific modification might be difficult to justify.

13) Figs. 5 – 9. The interval boundaries for the colour bars are neither linear nor logarithmic, and some of the colours are difficult to distinguish. Is there a clear reason for the choice of the intervals? Can they be defined more systematically?

14)

There are several sentences where ‘which’ is used in situations where it should be ‘that’. The former should be used if additional information is added, the latter if a defining property is stated.
